# Supplementary material for: Extended viologen compounds with photochromism, photoresponsive luminescence and ultrahigh quenching efficiency
Source: Royal Society of Chemistry journal article supplement (doi:10.1039/d4ce00615a), 2024-01-01
Supplement: d4ce00615a1.pdf [file d4ce00615a1.pdf]

## Supporting information for:

# Photochromism and photoresponsive luminescence with ultra high quenching efficiency of extended viologens compounds

Lu Liu, Le-Tian Zhang, Feng-Chen Yuan, Hong-Xia Ren, Yue Ma, Qing-Lun Wang

**Table S1** Selected bond lengths (Å) and angles (°) for compound **1**.

| Bond lengths |          |           |            |
|--------------|----------|-----------|------------|
| O2-C1        | 1.335(3) | O1-C1     | 1.212(3)   |
| N2-C8        | 1.343(3) | N2-C4     | 1.350(3)   |
| N2-C3        | 1.495(3) | N1-C10    | 1.366(3)   |
| N1-C9        | 1.317(3) |           |            |
| Bond angles  |          |           |            |
| C8-N2-C4     | 121.3(2) | C8-N2-C3  | 118.7(2)   |
| C4-N2-C3     | 119.9(2) | C9-N1-C10 | 108.1(2)   |
| N1-C10-C10#1 | 117.0(3) | N2-C4-C5  | 120.3(2)   |
| N1-C9-C7     | 120.8(2) | N2-C3-C2  | 112.3(2)   |
| N2-C8-C7     | 120.8(2) | O1-C1-O2  | 124.0(2)   |
| O1-C1-C2     | 124.1(2) | O2-C1-C2  | 111.93(19) |

Symmetry transformations used to generate equivalent atoms: #1 -x,-y+1,-z+1

**Table S2** Selected bond lengths (Å) and angles (°) for compound **2**.

| Bond lengths |            |            |            |
|--------------|------------|------------|------------|
| Br1-Cd1      | 2.5731(5)  | Br2-Cd1    | 2.5769(5)  |
| Cd1-O1       | 2.403(3)   | Cd1-O2     | 2.404(3)   |
| Cd1-O3       | 2.186(3)   |            |            |
| Bond angles  |            |            |            |
| Br1-Cd1-Br2  | 94.70(3)   | O1-Cd1-Br1 | 164.85(12) |
| O1-Cd1-Br2   | 89.77(13)  | O1-Cd1-O2  | 53.32(16)  |
| O1-Cd1-O3    | 83.27(18)  | O2-Cd1-Br1 | 111.61(11) |
| O2-Cd1-Br2   | 98.63(12)  | O3-Cd1-Br1 | 92.17(12)  |
| O3-Cd1-Br2   | 173.02(12) | O3-Cd1-O2  | 77.65(17)  |
| O4-Cd1-Br1   | 110.79(13) | O4-Cd1-Br2 | 90.85(15)  |
| O4-Cd1-O1    | 83.55(18)  | O4-Cd1-O2  | 135.47(17) |
| O4-Cd1-O3    | 87.83(19)  | C1-O1-Cd1  | 98.6(4)    |
| C1-O2-Cd1    | 85.6(4)    |            |            |

**Table S3** Selected bond lengths (Å) and angles (°) for compound **3**.

| Bond lengths                                                                                       |             |             |            |
|----------------------------------------------------------------------------------------------------|-------------|-------------|------------|
| Br1-Zn1                                                                                            | 2.3852(2)   | Zn1-Br1#1   | 2.3852(2)  |
| Zn1-O2                                                                                             | 1.9663(14)  | Zn1-O2#1    | 1.9663(14) |
| Bond angles                                                                                        |             |             |            |
| Br1-Zn1-Br1#1                                                                                      | 117.260(15) | O2#1-Zn-Br1 | 110.51(4)  |
| O2#1-Zn-Br1#1                                                                                      | 113.52(4)   | O2-Zn-Br1#1 | 110.51(4)  |
| O2-Zn-Br1                                                                                          | 113.52(4)   | O2#1-Zn-O2  | 87.92(8)   |
| Symmetry transformations used to generate equivalent atoms: #1 -x+1,y,-z+1/2 #2 -x+1/2,-y+1/2,-z+1 |             |             |            |

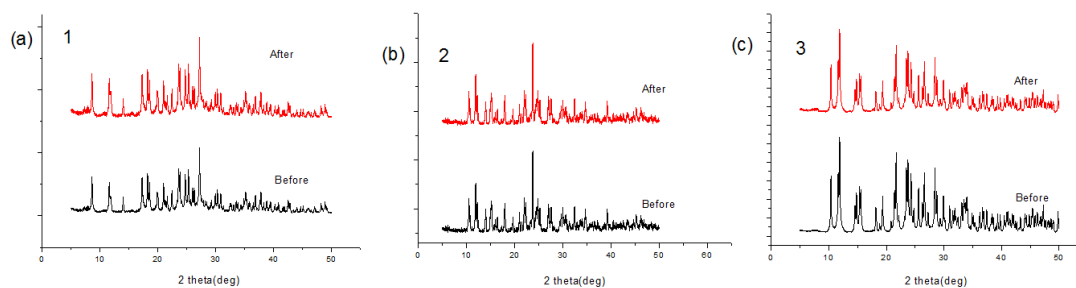

**Fig. S1** PXRD of **1(a)**, **2(b)** and **3(c)** before and after irradiation.

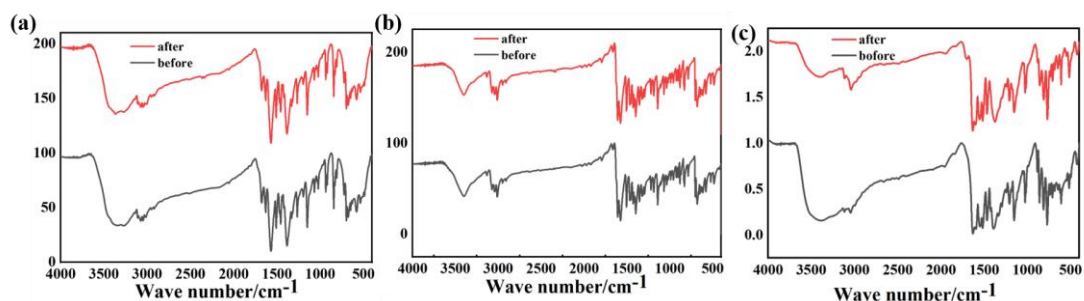

**Fig. S2** IR spectra of **1(a)**, **2(b)** and **3(c)** before and after irradiation.
